# Supplementary material for: Assessing and Resolving Model Misspecifications in Metabolic Flux Analysis
Source: Preprints.org preprint supplement (doi:10.20944/preprints201703.0124.v1), 2017-03-16
Supplement: Supplementary file 1 [file supplementary]

# Supplementary Material for Assessing and Resolving Model Misspecifications in Metabolic Flux Analysis

Rudiyanto Gunawan and Sandro Hutter

Institute for Chemical and Bioengineering, ETH Zurich, Zurich, Switzerland

Swiss Institute of Bioinformatics, Lausanne, Switzerland

**Table S1.** Metabolic reactions and exchange fluxes in the Chinese hamster ovary metabolic model (adapted from [16,25]).

| #  | Formula |   |          |   |         |   |          |   |        |   |       |
|----|---------|---|----------|---|---------|---|----------|---|--------|---|-------|
| 1  | Glc     | → | G6P      |   |         |   |          |   |        |   |       |
| 2  | G6P     | → | 2 DHAP   |   |         |   |          |   |        |   |       |
| 3  | DHAP    | → | Pyr      |   |         |   |          |   |        |   |       |
| 4  | G6P     | → | R5P      |   |         |   |          |   |        |   |       |
| 5  | Pyr     | → | Lac      |   |         |   |          |   |        |   |       |
| 6  | mAcCoA  | → | AcOH     |   |         |   |          |   |        |   |       |
| 7  | Mal     | → | Pyr      |   |         |   |          |   |        |   |       |
| 8  | mPyr    | → | mAcCoA   |   |         |   |          |   |        |   |       |
| 9  | mAcCoA  | + | mOxal    | → | mCit    |   |          |   |        |   |       |
| 10 | mCit    | → | mαKG     |   |         |   |          |   |        |   |       |
| 11 | mαKG    | → | mSucCoA  |   |         |   |          |   |        |   |       |
| 12 | mSucCoA | → | mSuc     |   |         |   |          |   |        |   |       |
| 13 | mSuc    | → | mMal     |   |         |   |          |   |        |   |       |
| 14 | mMal    | → | mOxal    |   |         |   |          |   |        |   |       |
| 15 | Oxal    | → | Mal      |   |         |   |          |   |        |   |       |
| 16 | Glu     | + | Pyr      | → | αKG     | + | Ala      |   |        |   |       |
| 17 | mGlu    | → | Amm      | + | mαKG    |   |          |   |        |   |       |
| 18 | Glu     | + | Amm      | → | Gln     |   |          |   |        |   |       |
| 19 | Glu     | + | Oxal     | → | Asp     | + | αKG      |   |        |   |       |
| 20 | Glu     | → | Pgl      |   |         |   |          |   |        |   |       |
| 21 | Ser     | → | Pyr      | + | Amm     |   |          |   |        |   |       |
| 22 | Ser     | → | Gly      | + | NMFH4   |   |          |   |        |   |       |
| 23 | Amm     | + | NMFH4    | → | Gly     |   |          |   |        |   |       |
| 24 | Thr     | → | Gly      | + | mAcCoA  |   |          |   |        |   |       |
| 25 | Cys     | + | αKG      | → | Glu     | + | Pyr      |   |        |   |       |
| 26 | His     | → | Glu      | + | NMFH4   | + | 2 Amm    |   |        |   |       |
| 27 | Arg     | + | αKG      | → | 2 Glu   |   |          |   |        |   |       |
| 28 | Pro     | → | Glu      |   |         |   |          |   |        |   |       |
| 29 | Asn     | → | Amm      | + | Asp     |   |          |   |        |   |       |
| 30 | Ile     | + | αKG      | → | mSucCoA | + | Glu      | + | mAcCoA |   |       |
| 31 | Leu     | + | αKG      | + | mSucCoA | → | 2 mAcCoA | + | mSuc   | + | Glu   |
| 32 | Lys     | + | αKG      | → | Glu     | + | 2 mAcCoA | + | Amm    |   |       |
| 33 | Met     | + | Ser      | → | mSucCoA | + | Cys      | + | Amm    | + | NMFH4 |
| 34 | Phe     | → | Tyr      |   |         |   |          |   |        |   |       |
| 35 | Trp     | → | 2 mAcCoA | + | Ala     | + | Amm      |   |        |   |       |

|    |           |   |             |   |               |     |             |   |           |   |           |
|----|-----------|---|-------------|---|---------------|-----|-------------|---|-----------|---|-----------|
| 36 | Tyr       | + | $\alpha$ KG | + | mSucCoA       | →   | Glu         | + | Mal       | + | 2 mAcCoA  |
|    |           |   | + mSuc      |   |               |     |             |   |           |   |           |
| 37 | Val       | + | $\alpha$ KG | → | mSucCoA       | +   | Glu         |   |           |   |           |
| 38 | G6P       | → | Carb        |   |               |     |             |   |           |   |           |
| 39 | 9 mCit    | + | 9 Mal       | → | OA            | +   | 9 mMal      | + | 9 Oxal    |   |           |
| 40 | 1.9 Gln   | + | 1.3 Asp     | + | 0.5 Gly       | +   | 1.3 NMFH4   | + | R5P       | → | 1.9 Glu   |
|    |           | + | 0.8 Mal     | + | DNA           |     |             |   |           |   |           |
| 41 | 2.091 Gln | + | 1.194 Asp   | + | 0.489 Gly     | +   | 0.978 NMFH4 | + | R5P       | → | 2.091 Glu |
|    |           | + | 0.683 Mal   | + | RNA           |     |             |   |           |   |           |
| 42 | 0.095 Ala | + | 0.048 Asp   | + | 0.039 Asn     | +   | 0.063 Arg   | + | 0.028 Cys | + | 0.052 Gln |
|    |           | + | 0.064 Glu   | + | 0.078 Gly     | +   | 0.022 His   | + | 0.052 Ile | + | 0.088 Leu |
|    |           | + | 0.089 Lys   | + | 0.02 Met      | +   | 0.021 Phe   | + | 0.028 Pro | + | 0.057 Ser |
|    |           | + | 0.061 Thr   | + | 0.006 Trp     | +   | 0.02 Tyr    | + | 0.059 Val | → | Prot      |
| 43 | mMal      | + | $\alpha$ KG | → | m $\alpha$ KG | +   | Mal         |   |           |   |           |
| 44 | mMal      | + | Cit         | → | mCit          | +   | Mal         |   |           |   |           |
| 45 | Glu       | → | mGlu        |   |               |     |             |   |           |   |           |
| 46 | Pyr       | → | mPyr        |   |               |     |             |   |           |   |           |
| 47 | FoOH      | → | NMFH4       |   |               |     |             |   |           |   |           |
|    |           |   | → Ala       |   |               |     |             |   |           |   |           |
|    |           |   | → 2 Cys     |   |               |     |             |   |           |   |           |
|    |           |   | → Gly       |   |               |     |             |   |           |   |           |
|    |           |   | → Ser       |   |               |     |             |   |           |   |           |
|    |           |   | → Thr       |   |               |     |             |   |           |   |           |
|    |           |   | → Arg       |   |               |     |             |   |           |   |           |
|    |           |   | → Glu       |   |               |     |             |   |           |   |           |
|    |           |   | → Gln       |   |               |     |             |   |           |   |           |
|    |           |   | → His       |   |               |     |             |   |           |   |           |
|    |           |   | → Pro       |   |               |     |             |   |           |   |           |
|    |           |   | → Asp       |   |               |     |             |   |           |   |           |
|    |           |   | → Asn       |   |               |     |             |   |           |   |           |
|    |           |   | → Ile       |   |               |     |             |   |           |   |           |
|    |           |   | → Leu       |   |               |     |             |   |           |   |           |
|    |           |   | → Lys       |   |               |     |             |   |           |   |           |
|    |           |   | → Met       |   |               |     |             |   |           |   |           |
|    |           |   | → Phe       |   |               |     |             |   |           |   |           |
|    |           |   | → Trp       |   |               |     |             |   |           |   |           |
|    |           |   | → Tyr       |   |               |     |             |   |           |   |           |
|    |           |   | → Val       |   |               |     |             |   |           |   |           |
|    |           |   | → Lac       |   |               |     |             |   |           |   |           |
|    |           |   | → Glc       |   |               |     |             |   |           |   |           |
|    |           |   | → Amm       |   |               |     |             |   |           |   |           |
|    |           |   | → Carb      |   |               |     |             |   |           |   |           |
|    |           |   | → OA        |   |               |     |             |   |           |   |           |
|    |           |   | → DNA       |   |               |     |             |   |           |   |           |
|    |           |   | → RNA       |   |               |     |             |   |           |   |           |
|    |           |   | → Prot      |   |               |     |             |   |           |   |           |
|    |           |   | → Ala       |   | +             | Gln |             |   |           |   |           |

- FoOH
  - AcOH
  - Pyr
  - Cit
  - Pgl
-

**Table S2.** Intracellular flux estimate of the CHO cell culture using GLS regression.

| #  | $\hat{v}_{i, \text{GLS}} \left( \frac{\text{nmol}}{1\text{e6cells h}} \right)$ |
|----|--------------------------------------------------------------------------------|
| 1  | 161.2                                                                          |
| 2  | 157.8                                                                          |
| 3  | 315.5                                                                          |
| 4  | 1.2                                                                            |
| 5  | 291.2                                                                          |
| 6  | 1.1                                                                            |
| 7  | 19.6                                                                           |
| 8  | 15.0                                                                           |
| 9  | 12.5                                                                           |
| 10 | -1.5                                                                           |
| 11 | 17.8                                                                           |
| 12 | 17.4                                                                           |
| 13 | 18.1                                                                           |
| 14 | 12.5                                                                           |
| 15 | 12.3                                                                           |
| 16 | 19.3                                                                           |
| 17 | -0.2                                                                           |
| 18 | -21.5                                                                          |
| 19 | 0.0                                                                            |
| 20 | 4.0                                                                            |
| 21 | -6.8                                                                           |
| 22 | 7.2                                                                            |
| 23 | -1.3                                                                           |
| 24 | -0.4                                                                           |
| 25 | 0.0                                                                            |
| 26 | 0.3                                                                            |
| 27 | 0.3                                                                            |
| 28 | 1.0                                                                            |
| 29 | 1.0                                                                            |
| 30 | -0.3                                                                           |
| 31 | -0.2                                                                           |
| 32 | -1.2                                                                           |
| 33 | 0.2                                                                            |
| 34 | 0.5                                                                            |
| 35 | 0.1                                                                            |
| 36 | 0.9                                                                            |
| 37 | 0.3                                                                            |
| 38 | 2.1                                                                            |
| 39 | 1.4                                                                            |
| 40 | 0.3                                                                            |
| 41 | 0.9                                                                            |
| 42 | 32.3                                                                           |
| 43 | 19.5                                                                           |
| 44 | -1.6                                                                           |
| 45 | -0.2                                                                           |
| 46 | 15.0                                                                           |
| 47 | -7.8                                                                           |

**Table S3** Case study II: Other misspecification tests using the F-test (values represent rates)

| <i>m</i>                   | <i>n<sub>vI</sub></i> | <i>n<sub>vE</sub></i> | <i>n<sub>vO</sub></i>    | CoV  | TP   | FN   | FP   | TN   |
|----------------------------|-----------------------|-----------------------|--------------------------|------|------|------|------|------|
| 100                        | 60                    | 45                    | 2                        | 0.01 | 0.93 | 0.07 | 0.10 | 0.90 |
|                            |                       |                       |                          | 0.05 | 0.89 | 0.11 | 0.11 | 0.89 |
|                            |                       |                       |                          | 0.1  | 0.88 | 0.12 | 0.10 | 0.90 |
|                            |                       |                       |                          | 0.2  | 0.82 | 0.19 | 0.09 | 0.91 |
|                            |                       |                       | 5                        | 0.01 | 1.00 | 0.00 | 0.12 | 0.88 |
|                            |                       |                       |                          | 0.05 | 1.00 | 0.00 | 0.11 | 0.89 |
|                            |                       |                       |                          | 0.1  | 0.99 | 0.01 | 0.12 | 0.88 |
|                            |                       |                       |                          | 0.2  | 0.99 | 0.01 | 0.12 | 0.89 |
|                            |                       |                       | 10                       | 0.01 | 1.00 | 0.00 | 0.14 | 0.86 |
|                            |                       |                       |                          | 0.05 | 1.00 | 0.00 | 0.12 | 0.88 |
|                            |                       |                       |                          | 0.1  | 1.00 | 0.00 | 0.13 | 0.88 |
|                            |                       |                       |                          | 0.2  | 0.99 | 0.01 | 0.12 | 0.88 |
| <i>m</i>                   | <i>n<sub>vI</sub></i> | <i>n<sub>vE</sub></i> | <i>n<sub>vO</sub></i>    | CoV  | TP   | FN   | FP   | TN   |
| 100                        | 60                    | 55                    | 2                        | 0.01 | 0.97 | 0.03 | 0.11 | 0.90 |
|                            |                       |                       |                          | 0.05 | 0.95 | 0.05 | 0.10 | 0.90 |
|                            |                       |                       |                          | 0.1  | 0.91 | 0.09 | 0.09 | 0.91 |
|                            |                       |                       |                          | 0.2  | 0.83 | 0.17 | 0.10 | 0.90 |
|                            |                       |                       | 5                        | 0.01 | 1.00 | 0.00 | 0.10 | 0.90 |
|                            |                       |                       |                          | 0.05 | 1.00 | 0.00 | 0.11 | 0.89 |
|                            |                       |                       |                          | 0.1  | 0.99 | 0.01 | 0.08 | 0.92 |
|                            |                       |                       |                          | 0.2  | 0.98 | 0.02 | 0.08 | 0.92 |
|                            |                       |                       | 10                       | 0.01 | 1.00 | 0.00 | 0.13 | 0.87 |
|                            |                       |                       |                          | 0.05 | 1.00 | 0.00 | 0.11 | 0.89 |
|                            |                       |                       |                          | 0.1  | 1.00 | 0.00 | 0.11 | 0.89 |
|                            |                       |                       |                          | 0.2  | 1.00 | 0.00 | 0.11 | 0.89 |
| <i>m</i>                   | <i>n<sub>vI</sub></i> | <i>n<sub>vE</sub></i> | <i>n<sub>vO</sub></i>    | CoV  | TP   | FN   | FP   | TN   |
| 100                        | 55                    | 55                    | 2                        | 0.01 | 0.84 | 0.16 | 0.10 | 0.90 |
|                            |                       |                       |                          | 0.05 | 0.83 | 0.17 | 0.11 | 0.90 |
|                            |                       |                       |                          | 0.1  | 0.80 | 0.20 | 0.09 | 0.91 |
|                            |                       |                       |                          | 0.2  | 0.72 | 0.28 | 0.10 | 0.90 |
|                            |                       |                       | 5                        | 0.01 | 0.98 | 0.02 | 0.13 | 0.87 |
|                            |                       |                       |                          | 0.05 | 0.98 | 0.02 | 0.14 | 0.86 |
|                            |                       |                       |                          | 0.1  | 0.97 | 0.04 | 0.13 | 0.87 |
|                            |                       |                       |                          | 0.2  | 0.93 | 0.07 | 0.11 | 0.89 |
|                            |                       |                       | 10                       | 0.01 | 1.00 | 0.00 | 0.14 | 0.86 |
|                            |                       |                       |                          | 0.05 | 1.00 | 0.00 | 0.13 | 0.87 |
|                            |                       |                       |                          | 0.1  | 1.00 | 0.00 | 0.14 | 0.86 |
|                            |                       |                       |                          | 0.2  | 0.99 | 0.01 | 0.13 | 0.87 |
| <i>m</i>                   | <i>n<sub>vI</sub></i> | <i>n<sub>vE</sub></i> | <i>n<sub>vO</sub></i>    | CoV  | TP   | FN   | FP   | TN   |
| 100                        | 65                    | 45                    | 2                        | 0.01 | 0.95 | 0.05 | 0.10 | 0.90 |
|                            |                       |                       |                          | 0.05 | 0.93 | 0.07 | 0.11 | 0.90 |
|                            |                       |                       |                          | 0.1  | 0.90 | 0.11 | 0.10 | 0.90 |
|                            |                       |                       |                          | 0.2  | 0.81 | 0.19 | 0.08 | 0.92 |
|                            |                       |                       | 5                        | 0.01 | 1.00 | 0.00 | 0.12 | 0.88 |
|                            |                       |                       |                          | 0.05 | 1.00 | 0.00 | 0.11 | 0.90 |
|                            |                       |                       |                          | 0.1  | 1.00 | 0.00 | 0.10 | 0.90 |
|                            |                       |                       |                          | 0.2  | 0.98 | 0.02 | 0.10 | 0.90 |
|                            |                       |                       | 10                       | 0.01 | 1.00 | 0.00 | 0.09 | 0.91 |
|                            |                       |                       |                          | 0.05 | 1.00 | 0.00 | 0.12 | 0.88 |
|                            |                       |                       |                          | 0.1  | 1.00 | 0.00 | 0.11 | 0.89 |
|                            |                       |                       |                          | 0.2  | 1.00 | 0.00 | 0.10 | 0.90 |
| <i>n<sub>species</sub></i> | <i>n<sub>vI</sub></i> | <i>n<sub>vE</sub></i> | <i>n<sub>vOmit</sub></i> | CoV  | TP   | FN   | FP   | TN   |

|                                               |    |      |      |      |      |      |    |    |
|-----------------------------------------------|----|------|------|------|------|------|----|----|
| 503025                                        | 2  | 0.01 | 0.86 | 0.14 | 0.11 | 0.89 |    |    |
|                                               |    | 0.05 | 0.82 | 0.18 | 0.10 | 0.90 |    |    |
|                                               |    | 0.1  | 0.75 | 0.25 | 0.09 | 0.91 |    |    |
|                                               |    | 0.2  | 0.69 | 0.31 | 0.09 | 0.91 |    |    |
|                                               | 5  | 0.01 | 0.99 | 0.01 | 0.10 | 0.90 |    |    |
|                                               |    | 0.05 | 0.98 | 0.02 | 0.10 | 0.90 |    |    |
|                                               |    | 0.1  | 0.97 | 0.03 | 0.10 | 0.90 |    |    |
|                                               |    | 0.2  | 0.92 | 0.08 | 0.11 | 0.89 |    |    |
|                                               | 10 | 0.01 | 1.00 | 0.00 | 0.10 | 0.90 |    |    |
|                                               |    | 0.05 | 1.00 | 0.00 | 0.09 | 0.91 |    |    |
|                                               |    | 0.1  | 1.00 | 0.00 | 0.09 | 0.91 |    |    |
|                                               |    | 0.2  | 0.99 | 0.02 | 0.11 | 0.90 |    |    |
| $m \quad n_{v_I} \quad n_{v_E} \quad n_{v_0}$ |    |      |      | CoV  | TP   | FN   | FP | TN |
| 200120100                                     | 2  | 0.01 | 0.76 | 0.24 | 0.11 | 0.89 |    |    |
|                                               |    | 0.05 | 0.73 | 0.27 | 0.10 | 0.90 |    |    |
|                                               |    | 0.1  | 0.67 | 0.33 | 0.07 | 0.93 |    |    |
|                                               |    | 0.2  | 0.58 | 0.42 | 0.10 | 0.90 |    |    |
|                                               | 5  | 0.01 | 0.97 | 0.03 | 0.16 | 0.84 |    |    |
|                                               |    | 0.05 | 0.95 | 0.05 | 0.11 | 0.89 |    |    |
|                                               |    | 0.1  | 0.94 | 0.07 | 0.13 | 0.87 |    |    |
|                                               |    | 0.2  | 0.88 | 0.12 | 0.13 | 0.88 |    |    |
|                                               | 10 | 0.01 | 1.00 | 0.00 | 0.15 | 0.85 |    |    |
|                                               |    | 0.05 | 0.99 | 0.01 | 0.16 | 0.84 |    |    |
|                                               |    | 0.1  | 1.00 | 0.01 | 0.13 | 0.87 |    |    |
|                                               |    | 0.2  | 0.98 | 0.02 | 0.15 | 0.85 |    |    |
|                                               | 20 | 0.01 | 1.00 | 0.00 | 0.14 | 0.86 |    |    |
|                                               |    | 0.05 | 1.00 | 0.00 | 0.14 | 0.86 |    |    |
|                                               |    | 0.1  | 1.00 | 0.00 | 0.15 | 0.86 |    |    |
|                                               |    | 0.2  | 1.00 | 0.00 | 0.14 | 0.86 |    |    |

**Table S4** Case study III: Iterative procedure for resolving model misspecification in the CHO model  
( $k = 2$ ).

| <b>k</b> | <b>n<sub>extra</sub></b> | <b>n<sub>omit</sub></b> | <b>Number of remaining reactions<sup>a</sup></b> |                          |
|----------|--------------------------|-------------------------|--------------------------------------------------|--------------------------|
|          |                          |                         | <b>Extra reactions</b>                           | <b>Omitted reactions</b> |
| 2        | 5                        | 5                       | 0                                                | 0                        |
|          | 8                        | 8                       | 0                                                | 0                        |

<sup>a</sup>The number of remaining reactions corresponds to the average over 100 generations of the stoichiometric matrix  $\mathbf{S}_{\mathbf{I},\text{true}}$ , of the median number across 100 *in silico* data simulations.
